# Supplementary material for: Guidelines and best practice recommendations on reproductive health services provision amid COVID-19 pandemic: scoping review
Source: BMC Public Health. 2021 Feb 3;21:276. doi: 10.1186/s12889-021-10346-2 (PMC7856605; doi:10.1186/s12889-021-10346-2)
Supplement: Supplementary file 2 — Additional file 2. Data extraction tool safe abortion, contraception, GBV, and ART service. [file 12889_2021_10346_MOESM2_ESM.xlsx]

## Sheet: Contraception 
Variables	WHO	ACOG	RCOG	FIGO	RCM	SOGC	RANZCOG	IPPF	UNFPA	MSI	FSRH	BSACP
Was contraception considered essential?	Yes. states If women do not want to become pregnant, should start or continue to use your contraceptive method of choice. Additional states women should be able to access information and contraceptive services from a healthcare provider by phone or online. If access to these services disrupted by COVID-19 pandemics WHO question and answer states that women may opt for a method that is available w…	yes	yes	yes	yes	yes	yes	yes	yes	yes	yes	Yes
New initiation of OCP	Remote assessment of medical eligibility and accurate self-reported BP/BMI. A 6-12-month supply should be provided		Remote assessment of medical eligibility and accurate self-reported BP/BMI. A 6-12-month supply should be provided	Remote assessment of medical eligibility and accurate self-reported BP/BMI. A 6-12-month supply should be provided	Remote assessment of medical eligibility and accurate self-reported BP/BMI. A 6-12-month supply should be provided	Remote assessment of medical eligibility and accurate self-reported BP/BMI. A 6-12-month supply should be provided	Remote assessment of medical eligibility and accurate self-reported BP/BMI. A 6-12-month supply should be provided	Remote assessment of medical eligibility and accurate self-reported BP/BMI. A 6-12-month supply should be provided	Remote assessment of medical eligibility and accurate self-reported BP/BMI. A 6-12-month supply should be provided	Remote assessment of medical eligibility and accurate self-reported BP/BMI. A 6-12-month supply should be provided	Remote assessment of medical eligibility and accurate self-reported BP/BMI. A 6-12-month supply should be provided	Remote assessment of medical eligibility and accurate self-reported BP/BMI. A 6-12-month supply should be provided
Refilling OCP	Remote assessment of medical eligibility 6-12-month supply should be provided	No new recommendation speacific to COVID-19	Remote assessment of medical eligibility and accurate self-reported BP/BMI. A 6-12-month supply should be provided	Remote assessment of medical eligibility and accurate self-reported BP/BMI. A 6-12-month supply should be provided	Remote assessment of medical eligibility and accurate self-reported BP/BMI. A 6-12-month supply should be provided	Remote assessment of medical eligibility and accurate self-reported BP/BMI. A 6-12-month supply should be provided	Remote assessment of medical eligibility and accurate self-reported BP/BMI. A 6-12-month supply should be provided	Remote assessment of medical eligibility and accurate self-reported BP/BMI. A 6-12-month supply should be provided	Remote assessment of medical eligibility and accurate self-reported BP/BMI. A 6-12-month supply should be provided	Remote assessment of medical eligibility and accurate self-reported BP/BMI. A 6-12-month supply should be provided	Remote assessment of medical eligibility and accurate self-reported BP/BMI. A 6-12-month supply should be provided	Remote assessment of medical eligibility and accurate self-reported BP/BMI. A 6-12-month supply should be provided
IUCD/implant insertion and DMPA injection(New)	No new recommendation speacific to COVID-19	No new recommendation speacific to COVID-19	Self-injectible contraception,where its must minumum face to face contact service for implant or IUCD.	Self-injectible contraception,where its must minumum face to face contact service for implant or IUCD.	Self-injectible contraception,where its must minumum face to face contact service for implant or IUCD.	Self-injectible contraception,where its must minumum face to face contact service for implant or IUCD.	Self-injectible contraception,where its must minumum face to face contact service for implant or IUCD.	Self-injectible contraception,where its must minumum face to face contact service for implant or IUCD.	Self-injectible contraception,where its must minumum face to face contact service for implant or IUCD.	Self-injectible contraception,where its must minumum face to face contact service for implant or IUCD.	Remote assessment of medical eligibility and accurate self-reported BP/BMI. A 6-12-month supply should be provided	Remote assessment of medical eligibility and accurate self-reported BP/BMI. A 6-12-month supply should be provided
IUCD/Implant removal/replacement ( basic removal versus missed IUCD/Implant removal)	No new recommendation speacific to COVID-19	No new recommendation speacific to COVID-19	Extended use and delayed removal unless series side effects happens	Extended use and delayed removal unless series side effects happens	Extended use and delayed removal unless series side effects happens			Extended use and delayed removal unless series side effects happens or minimum contact service	Extended use and delayed removal unless series side effects happens or minimum contact service	Extended use and delayed removal unless series side effects happens or minimum contact service	Extended use and delayed removal unless series side effects happens	Extended use and delayed removal unless series side effects happens
Post-partum family planning	No new recommendation speacific to COVID-19	No new recommendation speacific to COVID-19	Promote long term post-partum family planning.	Promote long term post-partum family planning.	Promote long term post-partum family planning.	Promote long term post-partum family planning.	Promote long term post-partum family planning.	Promote long term post-partum family planning.	Promote long term post-partum family planning.	Promote long term post-partum family planning.	Promote long term post-partum family planning.	Promote long term post-partum family planning.
Emeregency contraception.	No new recommendation speacific to COVID-19	No new recommendation speacific to COVID-19	Remote assessment of requirement and choice of EC,remote provision of oral contraception or minimum contact Cu-IUCD.	Remote assessment of requirement and choice of EC,remote provision of oral contraception or minimum contact Cu-IUCD.	Remote assessment of requirement and choice of EC,remote provision of oral contraception or minimum contact Cu-IUCD.				Remote assessment of requirement and choice of EC,remote provision of oral contraception or minimum contact Cu-IUCD.	Remote assessment of requirement and choice of EC,remote provision of oral contraception or minimum contact Cu-IUCD.	Remote assessment of requirement and choice of EC,remote provision of oral contraception or minimum contact Cu-IUCD.	Remote assessment of requirement and choice of EC,remote provision of oral contraception or minimum contact Cu-IUCD.

## Sheet: Safe abortion
Variables	WHO	ACOG	RCOG	FIGO	RCM	SOGC	RANZCOG	NAF	IPPF	UNFPA	MSI	FSRH	BSACP	Reproductive acces project.
Was abortion considered essential?	yes	yes	yes	yes	yes	yes	yes	yes	yes	yes	yes	yes	yes	yes
First trimster medication abortion(<12 weeks)	No speacific new guidline on abortion and COVID-19 but the existing WHO guidline recomends that women can safely self-manage medical abortion in circumstances where they have access to appropriate information and to health services should they need	No speacific new recommendation on abortion and COVID-19 except defining reproductive health services as essential.	Non-touch early medication abortion services to be delivered via video or teleconferencing and delivery of a treatment package	telemedicine, easy access to mifepristone and misoprostol, removal of unnecessary waiting periods digital patient education initiatives highlighting the safety of abortion ensuring the availability of abortion in different settings to the full extent of the local law.	Non-touch early medication abortion services to be delivered via video or teleconferencing and delivery of a treatment package	Non-touch early medication abortion services to be delivered via video or teleconferencing and delivery of a treatment package	Non-touch early medication abortion services to be delivered via video or teleconferencing and delivery of a treatment package	Non-touch early medication abortion services to be delivered via video or teleconferencing and delivery of a treatment package at home.	Non-touch early medication abortion services to be delivered via video or teleconferencing and delivery of a treatment package at home.	No speacific new guidline on abortion and COVID-19 but considered abortion services as essential to continue during the pandemics.	Non-touch early medication abortion services to be delivered via video or teleconferencing and delivery of a treatment package at home.	Non-touch early medication abortion services to be delivered via video or teleconferencing and delivery of a treatment package	Non-touch early medication abortion services to be delivered via video or teleconferencing and delivery of a treatment package	Non-touch early medication abortion services to be delivered via video or teleconferencing and delivery of a treatment package
Second trimster medication abortion(>12 weeks)	No speacific new guidline on abortion and COVID-19 except defining reproductive health services as essential service to continue during the pandemics(Refere WHO abortion guidelines)	No speacific new guidline or recommendation on abortion and COVID-19 during second trimester .	No speacific new guidline on second trimester medication abortion but recomends use of telemedicine for remote digital patient education and counselling to reduce waiting period and face to face contact while ensuring the availability of abortion to the full extent of the local law.	No speacific new guidline on second trimester medication abortion but recomends use of telemedicine for remote digital patient education and counselling to reduce waiting period and face to face contact while ensuring the availability of abortion to the full extent of the local law.	No speacific new guidline on second trimester medication abortion but recomends use of telemedicine for remote digital patient education and counselling to reduce waiting period and face to face contact while ensuring the availability of abortion to the full extent of the local law.	No speacific new guidline on second trimester medication abortion but recomends use of telemedicine for remote digital patient education and counselling to reduce waiting period and face to face contact while ensuring the availability of abortion to the full extent of the local law.	No speacific new guidline on second trimester medication abortion but recomends use of telemedicine for remote digital patient education and counselling to reduce waiting period and face to face contact while ensuring the availability of abortion to the full extent of the local law.	No speacific new guidline on second trimester medication abortion but recomends use of telemedicine for remote digital patient education and counselling to reduce waiting period and face to face contact while ensuring the availability of abortion to the full extent of the local law.	No speacific new guidline on second trimester medication abortion but recomends use of telemedicine for remote digital patient education and counselling to reduce waiting period and face to face contact while ensuring the availability of abortion to the full extent of the local law.	No speacific new guidline on abortion and COVID-19 but considered abortion services as essential to continue during the pandemics.	No speacific new guidline on second trimester medication abortion but recomends use of telemedicine for remote digital patient education and counselling to reduce waiting period and face to face contact while ensuring the availability of abortion to the full extent of the local law.	No speacific new guidline on second trimester medication abortion but recomends use of telemedicine for remote digital patient education and counselling to reduce waiting period and face to face contact while ensuring the availability of abortion to the full extent of the local law.	No speacific new guidline on second trimester medication abortion but recomends use of telemedicine for remote digital patient education and counselling to reduce waiting period and face to face contact while ensuring the availability of abortion to the full extent of the local law.	No speacific new guidline on second trimester medication abortion but recomends use of telemedicine for remote digital patient education and counselling to reduce waiting period and face to face contact while ensuring the availability of abortion to the full extent of the local law.
Surgical abortion	No speacific new guidline on abortion and COVID-19 except defining reproductive health services as essential service to continue during the pandemics(Refere WHO abortion guidelines)	No speacific new recommendation on abortion and COVID-19 except defining reproductive health services as essential.	Minimum contact procedure by remote digital patient education, counselling and evaluation. Increasing safety by reducing number of people in the procedure room, sanitaizer and surgical mask for women and procedure appropriate PPE.	Minimum contact procedure by remote digital patient education, counselling and evaluation. Increasing safety by reducing number of people in the procedure room, sanitaizer and surgical mask for women and procedure appropriate PPE.	Minimum contact procedure by remote digital patient education, counselling and evaluation. Increasing safety by reducing number of people in the procedure room, sanitaizer and surgical mask for women and procedure appropriate PPE.	Minimum contact procedure by remote digital patient education, counselling and evaluation. Increasing safety by reducing number of people in the procedure room, sanitaizer and surgical mask for women and procedure appropriate PPE.	Minimum contact procedure by remote digital patient education, counselling and evaluation. Increasing safety by reducing number of people in the procedure room, sanitaizer and surgical mask for women and procedure appropriate PPE.	Minimum contact procedure by remote digital patient education, counselling and evaluation. Increasing safety by reducing number of people in the procedure room, sanitaizer and surgical mask for women and procedure appropriate PPE.	Minimum contact procedure by remote digital patient education, counselling and evaluation. Increasing safety by reducing number of people in the procedure room, sanitaizer and surgical mask for women and procedure appropriate PPE.		Minimum contact procedure by remote digital patient education, counselling and evaluation. Increasing safety by reducing number of people in the procedure room, sanitaizer and surgical mask for women and procedure appropriate PPE.	Minimum contact procedure by remote digital patient education, counselling and evaluation. Increasing safety by reducing number of people in the procedure room, sanitaizer and surgical mask for women and procedure appropriate PPE.	Minimum contact procedure by remote digital patient education, counselling and evaluation. Increasing safety by reducing number of people in the procedure room, sanitaizer and surgical mask for women and procedure appropriate PPE.
Post abortion family planning	No speacific new recomendation post- abortion contraception and COVID-19 except defining reproductive health services as essential service to continue during the pandemics(Refere WHO abortion guidelines)

## Sheet: Gender based violence
Variables	WHO	ACOG	RCOG	FIGO	IMS	SOGC	RANZCOG	SFP	NAF	IPPF	UNFP	MSI
Service organization changes	Medical, legal and policy mechanisms for victims of gender-based violence remain in place during the pandemic crisis
Medical care changes

## Sheet: ART
Variables	ESHRE	ASRM	HFEA	BFS	FSA
Any change in IVF practice	Assisted reproduction (including diagnostic procedures for infertility) shouldn't be started during the pandemics except in cases of urgent fertility preservation such as in oncology patients, the cryopreservation of gametes, embryos or tissue
Any change in IUI practice.
